# Supplementary material for: Computational analysis of the oscillatory behavior at the translation level induced by mRNA levels oscillations due to finite intracellular resources
Source: PubMed Central journal article supplement (PMC5898785; doi:10.1371/journal.pcbi.1006055), 2018-04-03
Supplement: pcbi.1006055.s002.pdf [file pcbi.1006055.s002.pdf]

Table S2  
 CODONS DECODING TIMES IN SECONDS UNITS ("DT" DENOTES DECODING TIME).

| Codon | DT     | Codon | DT     | Codon | DT     | Codon | DT     |
|-------|--------|-------|--------|-------|--------|-------|--------|
| AAA   | 0.1685 | CAA   | 0.1457 | GAA   | 0.1333 | TAA   | 0      |
| AAC   | 0.1595 | CAC   | 0.1378 | GAC   | 0.1392 | TAC   | 0.1318 |
| AAG   | 0.1291 | CAG   | 0.1936 | GAG   | 0.1553 | TAG   | 0      |
| AAT   | 0.1872 | CAT   | 0.1750 | GAT   | 0.1608 | TAT   | 0.1708 |
| ACA   | 0.1774 | CCA   | 0.1674 | GCA   | 0.1555 | TCA   | 0.1750 |
| ACC   | 0.1402 | CCC   | 0.1972 | GCC   | 0.1219 | TCC   | 0.1522 |
| ACG   | 0.1930 | CCG   | 0.1960 | GCG   | 0.1431 | TCG   | 0.1772 |
| ACT   | 0.1562 | CCT   | 0.1870 | GCT   | 0.1226 | TCT   | 0.1583 |
| AGA   | 0.1128 | CGA   | 0.2078 | GGA   | 0.1816 | TGA   | 0      |
| AGC   | 0.1581 | CGC   | 0.1640 | GGC   | 0.1518 | TGC   | 0.1791 |
| AGG   | 0.1444 | CGG   | 0.2246 | GGG   | 0.1698 | TGG   | 0.1307 |
| AGT   | 0.1626 | CGT   | 0.1258 | GGT   | 0.1249 | TGT   | 0.1511 |
| ATA   | 0.1725 | CTA   | 0.1541 | GTA   | 0.1564 | TTA   | 0.1552 |
| ATC   | 0.1349 | CTC   | 0.1697 | GTC   | 0.0831 | TTC   | 0.1275 |
| ATG   | 0.1263 | CTG   | 0.1732 | GTG   | 0.1534 | TTG   | 0.1401 |
| ATT   | 0.1549 | CTT   | 0.1706 | GTT   | 0.0973 | TTT   | 0.1609 |
