# Supplementary material for: Computational analysis of the oscillatory behavior at the translation level induced by mRNA levels oscillations due to finite intracellular resources
Source: PubMed Central journal article supplement (PMC5898785; doi:10.1371/journal.pcbi.1006055), 2018-04-03
Supplement: pcbi.1006055.s003.pdf [file pcbi.1006055.s003.pdf]

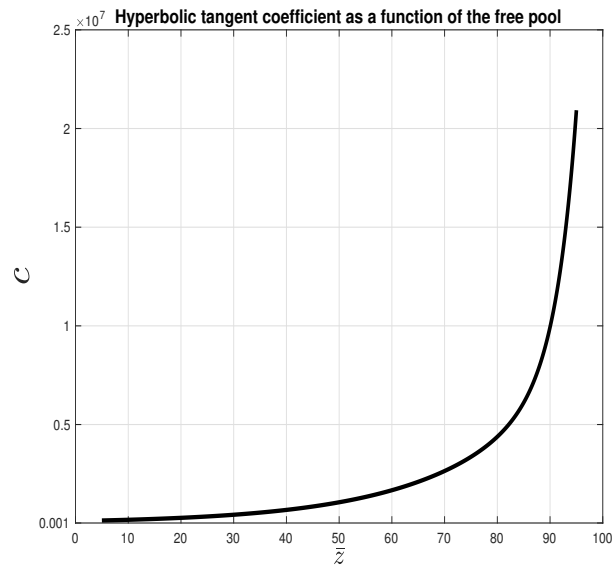

Fig. S1. The value of  $c$  in  $G(z) := \tanh(z/c)$ , as a function of the steady-state average free pool in percentage of the total pool. In the simulations  $G^j(z) := \tanh(z/c)$ ,  $c > 0$ , is used for all  $j \in \{1, \dots, m\}$ . This corresponds to the assumption of equal spatial availability of ribosomes relative to mRNA positions in the cell.
