# Supplementary material for: Computational analysis of the oscillatory behavior at the translation level induced by mRNA levels oscillations due to finite intracellular resources
Source: PubMed Central journal article supplement (PMC5898785; doi:10.1371/journal.pcbi.1006055), 2018-04-03
Supplement: pcbi.1006055.s004.pdf [file pcbi.1006055.s004.pdf]

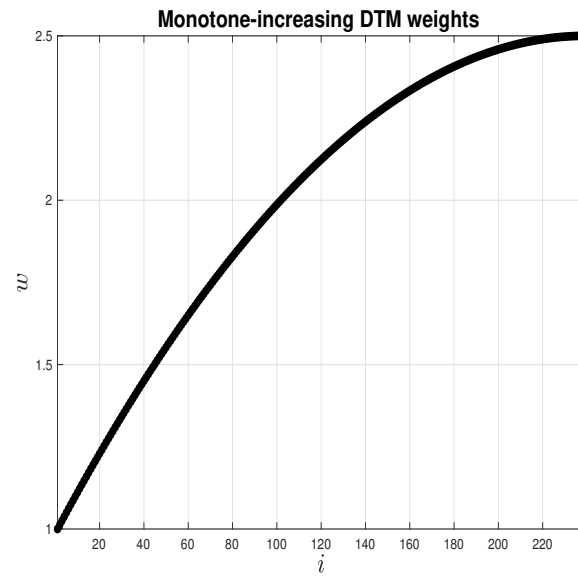

Fig. S2. DTM weights  $w_{iS}$  used in the computation of  $\tilde{\eta}$ .
