# Supplementary material for: Computational analysis of the oscillatory behavior at the translation level induced by mRNA levels oscillations due to finite intracellular resources
Source: PubMed Central journal article supplement (PMC5898785; doi:10.1371/journal.pcbi.1006055), 2018-04-03
Supplement: pcbi.1006055.s005.pdf [file pcbi.1006055.s005.pdf]

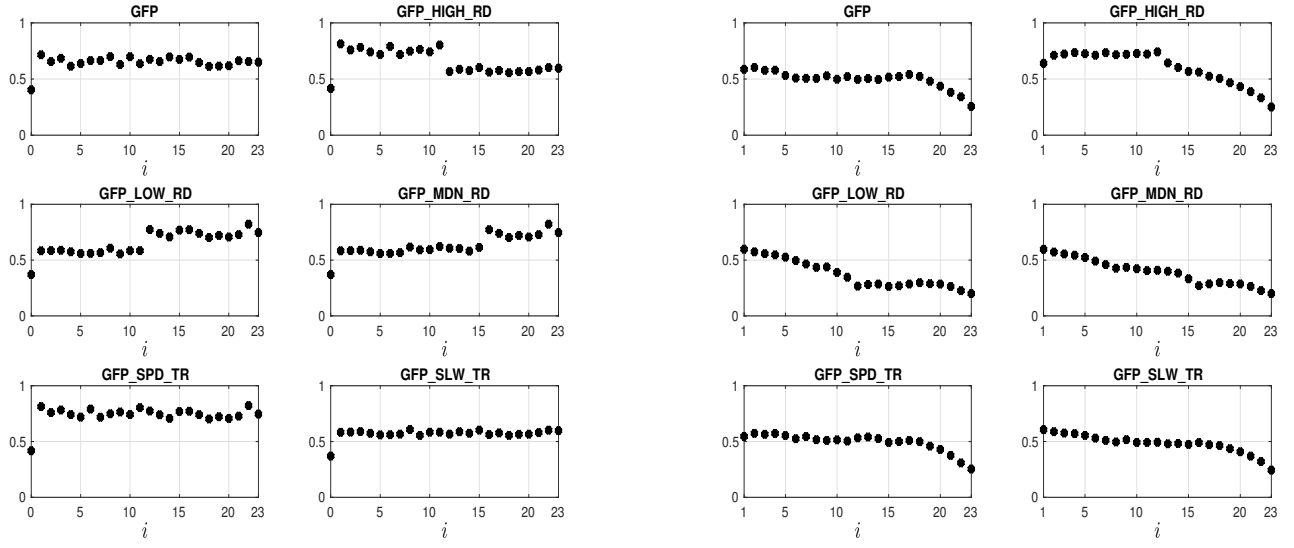

Fig. S3. RFMIO rates of the GFP gene and its mutations (left), and RFMIO steady-state densities of the GFP gene and its mutations (right).
