# Supplementary material for: Computational analysis of the oscillatory behavior at the translation level induced by mRNA levels oscillations due to finite intracellular resources
Source: PubMed Central journal article supplement (PMC5898785; doi:10.1371/journal.pcbi.1006055), 2018-04-03
Supplement: pcbi.1006055.s006.pdf [file pcbi.1006055.s006.pdf]

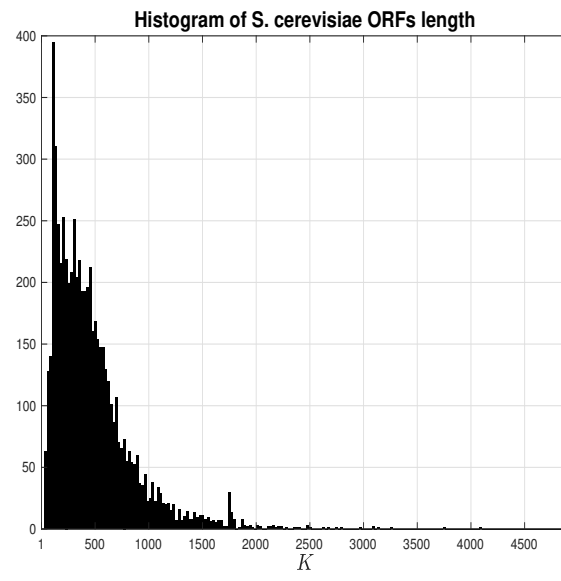

Fig. S4. Histogram of *S. cerevisiae* ORFs codon length  $K$ .
