# Supplementary material for: Computational analysis of the oscillatory behavior at the translation level induced by mRNA levels oscillations due to finite intracellular resources
Source: PLOS journal article supplement (doi:10.1371/journal.pcbi.1006055), 2018-04-03
Supplement: S7 (10.1371/journal.pcbi.1006055.s007) [file journal.pcbi.1006055.s007]

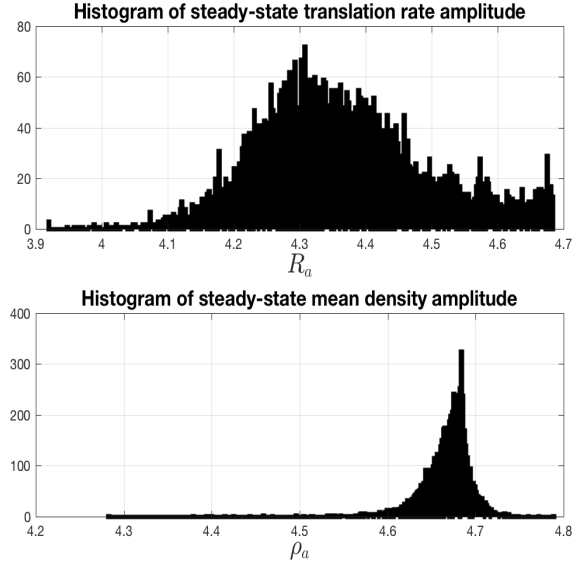

Fig. S5. Histograms of  $R_a^i$  (upper figure) and  $\rho_a^i$  (lower figure) over all *S. cerevisiae* genes for  $A = 0.35$ ,  $T = 16$ ,  $\tilde{L}_h = 20\%$ ,  $\alpha = 0.8$ , and  $\bar{z} = 30\%$ . In this case,  $z_a = 5.4706\%$ ,  $\bar{R}_a = 4.3655\%$ ,  $\bar{\rho}_a = 4.6672\%$ ,  $\hat{R}_a = 0.0170\%$ , and  $\hat{\rho}_a = 0.0008\%$  (all numbers are to four digit accuracy).
